# Supplementary material
Source: PubMed Central journal article supplement (PMC4158312)
Supplement: NIHMS607979-supplement-1.pdf [file NIHMS607979-supplement-1.pdf]

# SUPPLEMENTARY INFORMATION

Wang *et al.* 2014

## SUPPLEMENTARY TABLES

### Supplementary Table 1 | Spectral Karyotyping Data for 50 Single SK-BR-3 Cells

This table lists the genomic rearrangements that were detected in each single SK-BR-3 cell by Spectral Karyotyping. Rearrangements that were detected in a single cell are indicated by 1, while blank fields indicate that no rearrangements were detected. The frequencies of each rearrangement across all cells are shown in the bottom row.

### Supplementary Table 2 | Variants Detected in the SK-BR-3 Population Sample After Database Filtering

Table 2.1 - SNVs in Cancer Genes

Table 2.2 - Copy Number Aberrations in Cancer Genes

Table 2.3 - Structural Variations in Cancer Genes

Single nucleotide variants were detected in the SK-BR-3 population sample and filtered using 1000 genomes and dbSNP135 databases. Variants and copy number changes that intersect with regions of cancer genes are reported. Column descriptions are: *REF* (reference allele), *MUT* (mutated allele), *COSMIC* (variant occurs at a mutation site reported in the *COSMIC* database), *CANCER* (mutation occurs in a region of a known cancer gene), *Polyphen* (Polyphen conservation score was annotated), *SIFT* (SIFT conservation score is reported), *Nucleotide* (nucleotide mutation change), *Amino Acid* (amino acid change caused by the mutation), *ORI* (strand orientation) and *SV* (structural variant type: *CTX* – interchromosomal translocation, *ITX* – intrachromosomal translocation, *DEL* – chromosomal deletion).

### Supplementary Table 3 | Somatic Mutations Detected by Sequencing Populations of ER Tumor Cells

Nonsynonymous mutations detected in the ER breast tumor cell population. Column descriptions are: *type* (mutation classification), *COSMIC* (cosmic database), *Cancer* (cancer gene), *TCGA* (frequency in TCGA breast cancer cohort), *Nucleotide* (nucleotide substitution caused by the mutation), *Amino Acid* (amino acid change caused by the mutation).

### Supplementary Table 4 | ER Subclonal Mutations Detected by Whole Genome Single Nuclei Sequencing

Somatic mutations detected in 2 or more single tumor cells and not detected in the population of tumor sample. The column descriptions are: *REF* (reference allele), *VAR* (variant allele), *position* (genomic coordinate).

### **Supplementary Table 5 | Single Nuclei Sequencing Coverage Metrics**

Table 5.1 – ER Single Nuclei Sequencing Coverage Metrics

Table 5.2 – TNBC Single Nuclei Sequencing Metrics

Column descriptions are: *capture* (whole-genome or exome capture experiment), *cov\_depth* (coverage depth); *cov\_breadth* (coverage breadth). Both depth and breadth were calculated using uniquely mapped sequence reads.

### **Supplementary Table 6 | Clonal Nonsynonymous TNBC Mutations Detected by Population Sequencing**

Nonsynonymous point mutations detected by sequencing populations of cells from the triple-negative breast tumor. Mutations were validated by targeted duplex sequencing and the frequencies are reported along with p-values. Column descriptions are: *class* (mutation classification), *chrom* (chromosome), *pos* (nucleotide position), *type* (mutation), *REF* (reference allele), *VAR* (variant allele), *COSMIC* (cosmic database), *CANCER* (cancer gene database), *POLY* (polyphen2 score), *SIFT* (sift prediction score), *Genbank* (genbank identifier), *nucleotide* (mutated nucleotide position within the gene), *amino acid* (mutated amino acid change position within the gene), *duplex\_freq* (mutation frequency determined by targeted duplex sequencing), *duplex\_P\_val* (duplex p-value).

### **Supplementary Table 7 | Subclonal Nonsynonymous TNBC Mutations Detected by Single Nuclei Exome Sequencing**

Subclonal nonsynonymous mutations detected in two or more single cells, but not in the population sample. The subclonal mutations were validated by duplex targeted deep sequencing of the bulk tumor samples and the resulting mutation frequencies are displayed, along with the p-values. Column descriptions: *class* (mutation classification), *cells* (number of single cells with the mutations); *chrom* (chromosome), *pos* (nucleotide position), *REF* (reference allele), *VAR* (variant allele), *zygosity* (heterozygous or homozygous), *COSMIC* (cosmic database), *type* (mutation class), *CANCER* (cancer gene database), *POLY* (polyphen2 score), *SIFT* (sift prediction score), *Genbank* (genbank identifier), *exon* (exon number), *nucleotide* (mutated nucleotide position within the gene), *amino acid* (mutated amino acid change position within the gene), *Duplex\_Freq* (duplex mutation frequency) and *Duplex\_P\_val* (duplex p-value).

### **Supplementary Table 8 – Mathematical Modeling of Mutation Rates from Single Cell Mutation Frequency Data**

Table 8.1 – ER single nuclei whole genome data

Table 8.2 – ER single nuclei exome mutation data

Table 8.3 – TNBC single nuclei exome mutation data

These tables show the data from modeling mutation rates using single cell mutation frequency distributions. The simulated distributions for a series of mutation rates (MR) are generated and fit to the empirical datasets (observed). Best fit is determined by calculating the sum of square differences (SSD) and the lowest value is highlighted in yellow.

Supplementary Table 1 - Spectral Karyotype Data for 50 Single SK-BR-3 Cells

| cell no.  | del 1 | der(1)t(1;10) | der(1)t(1;5) | t(2;6) | t(2;6;4) | del (3) | del (5) | t(13;3;8;3;8;13) | t(8;4;6;12) | de(10q) | t(3;12) | t(13;4;17;11;20) | t(9;14) | t(14;22) | t(7;16) | t(17;19;20) | t(19;22) | t(X;8) | t(1;19;11;4;8) | del(18) |
|-----------|-------|---------------|--------------|--------|----------|---------|---------|------------------|-------------|---------|---------|------------------|---------|----------|---------|-------------|----------|--------|----------------|---------|
| 1         | 1     | 1             | 1            | 1      | 1        | 1       | 1       | 1                | 1           | 1       | 1       | 1                | 1       | 1        | 1       | 1           | 1        | 1      | 1              | 1       |
| 2         | 1     | 1             | 1            | 1      | 1        | 1       | 1       | 1                | 1           | 1       | 1       | 1                | 1       | 1        | 1       | 1           | 1        | 1      | 1              | 1       |
| 3         | 1     | 1             | 1            | 1      | 1        | 1       | 1       | 1                | 1           | 1       | 1       | 1                | 1       | 1        | 1       | 1           | 1        | 1      | 1              | 1       |
| 4         | 1     | 1             | 1            | 1      | 1        | 1       | 1       | 1                | 1           | 1       | 1       | 1                | 1       | 1        | 1       | 1           | 1        | 1      | 1              | 1       |
| 5         | 1     | 1             | 1            | 1      | 1        | 1       | 1       | 1                | 1           | 1       | 1       | 1                | 1       | 1        | 1       | 1           | 1        | 1      | 1              | 1       |
| 6         | 1     | 1             | 1            | 1      | 1        | 1       | 1       | 1                | 1           | 1       | 1       | 1                | 1       | 1        | 1       | 1           | 1        | 1      | 1              | 1       |
| 7         | 1     | 1             | 1            | 1      | 1        | 1       | 1       | 1                | 1           | 1       | 1       | 1                | 1       | 1        | 1       | 1           | 1        | 1      | 1              | 1       |
| 8         | 1     | 1             | 1            | 1      | 1        | 1       | 1       | 1                | 1           | 1       | 1       | 1                | 1       | 1        | 1       | 1           | 1        | 1      | 1              | 1       |
| 9         | 1     | 1             | 1            | 1      | 1        | 1       | 1       | 1                | 1           | 1       | 1       | 1                | 1       | 1        | 1       | 1           | 1        | 1      | 1              | 1       |
| 10        | 1     | 1             | 1            | 1      | 1        | 1       | 1       | 1                | 1           | 1       | 1       | 1                | 1       | 1        | 1       | 1           | 1        | 1      | 1              | 1       |
| 11        | 1     | 1             | 1            | 1      | 1        | 1       | 1       | 1                | 1           | 1       | 1       | 1                | 1       | 1        | 1       | 1           | 1        | 1      | 1              | 1       |
| 12        | 1     | 1             | 1            | 1      | 1        | 1       | 1       | 1                | 1           | 1       | 1       | 1                | 1       | 1        | 1       | 1           | 1        | 1      | 1              | 1       |
| 13        | 1     | 1             | 1            | 1      | 1        | 1       | 1       | 1                | 1           | 1       | 1       | 1                | 1       | 1        | 1       | 1           | 1        | 1      | 1              | 1       |
| 14        | 1     | 1             | 1            | 1      | 1        | 1       | 1       | 1                | 1           | 1       | 1       | 1                | 1       | 1        | 1       | 1           | 1        | 1      | 1              | 1       |
| 15        | 1     | 1             | 1            | 1      | 1        | 1       | 1       | 1                | 1           | 1       | 1       | 1                | 1       | 1        | 1       | 1           | 1        | 1      | 1              | 1       |
| 16        | 1     | 1             | 1            | 1      | 1        | 1       | 1       | 1                | 1           | 1       | 1       | 1                | 1       | 1        | 1       | 1           | 1        | 1      | 1              | 1       |
| 17        | 1     | 1             | 1            | 1      | 1        | 1       | 1       | 1                | 1           | 1       | 1       | 1                | 1       | 1        | 1       | 1           | 1        | 1      | 1              | 1       |
| 18        | 1     | 1             | 1            | 1      | 1        | 1       | 1       | 1                | 1           | 1       | 1       | 1                | 1       | 1        | 1       | 1           | 1        | 1      | 1              | 1       |
| 19        | 1     | 1             | 1            | 1      | 1        | 1       | 1       | 1                | 1           | 1       | 1       | 1                | 1       | 1        | 1       | 1           | 1        | 1      | 1              | 1       |
| 20        | 1     | 1             | 1            | 1      | 1        | 1       | 1       | 1                | 1           | 1       | 1       | 1                | 1       | 1        | 1       | 1           | 1        | 1      | 1              | 1       |
| 21        | 1     | 1             | 1            | 1      | 1        | 1       | 1       | 1                | 1           | 1       | 1       | 1                | 1       | 1        | 1       | 1           | 1        | 1      | 1              | 1       |
| 22        | 1     | 1             | 1            | 1      | 1        | 1       | 1       | 1                | 1           | 1       | 1       | 1                | 1       | 1        | 1       | 1           | 1        | 1      | 1              | 1       |
| 23        | 1     | 1             | 1            | 1      | 1        | 1       | 1       | 1                | 1           | 1       | 1       | 1                | 1       | 1        | 1       | 1           | 1        | 1      | 1              | 1       |
| 24        | 1     | 1             | 1            | 1      | 1        | 1       | 1       | 1                | 1           | 1       | 1       | 1                | 1       | 1        | 1       | 1           | 1        | 1      | 1              | 1       |
| 25        | 1     | 1             | 1            | 1      | 1        | 1       | 1       | 1                | 1           | 1       | 1       | 1                | 1       | 1        | 1       | 1           | 1        | 1      | 1              | 1       |
| 26        | 1     | 1             | 1            | 1      | 1        | 1       | 1       | 1                | 1           | 1       | 1       | 1                | 1       | 1        | 1       | 1           | 1        | 1      | 1              | 1       |
| 27        | 1     | 1             | 1            | 1      | 1        | 1       | 1       | 1                | 1           | 1       | 1       | 1                | 1       | 1        | 1       | 1           | 1        | 1      | 1              | 1       |
| 28        | 1     | 1             | 1            | 1      | 1        | 1       | 1       | 1                | 1           | 1       | 1       | 1                | 1       | 1        | 1       | 1           | 1        | 1      | 1              | 1       |
| 29        | 1     | 1             | 1            | 1      | 1        | 1       | 1       | 1                | 1           | 1       | 1       | 1                | 1       | 1        | 1       | 1           | 1        | 1      | 1              | 1       |
| 30        | 1     | 1             | 1            | 1      | 1        | 1       | 1       | 1                | 1           | 1       | 1       | 1                | 1       | 1        | 1       | 1           | 1        | 1      | 1              | 1       |
| 31        | 1     | 1             | 1            | 1      | 1        | 1       | 1       | 1                | 1           | 1       | 1       | 1                | 1       | 1        | 1       | 1           | 1        | 1      | 1              | 1       |
| 32        | 1     | 1             | 1            | 1      | 1        | 1       | 1       | 1                | 1           | 1       | 1       | 1                | 1       | 1        | 1       | 1           | 1        | 1      | 1              | 1       |
| 33        | 1     | 1             | 1            | 1      | 1        | 1       | 1       | 1                | 1           | 1       | 1       | 1                | 1       | 1        | 1       | 1           | 1        | 1      | 1              | 1       |
| 34        | 1     | 1             | 1            | 1      | 1        | 1       | 1       | 1                | 1           | 1       | 1       | 1                | 1       | 1        | 1       | 1           | 1        | 1      | 1              | 1       |
| 35        | 1     | 1             | 1            | 1      | 1        | 1       | 1       | 1                | 1           | 1       | 1       | 1                | 1       | 1        | 1       | 1           | 1        | 1      | 1              | 1       |
| 36        | 1     | 1             | 1            | 1      | 1        | 1       | 1       | 1                | 1           | 1       | 1       | 1                | 1       | 1        | 1       | 1           | 1        | 1      | 1              | 1       |
| 37        | 1     | 1             | 1            | 1      | 1        | 1       | 1       | 1                | 1           | 1       | 1       | 1                | 1       | 1        | 1       | 1           | 1        | 1      | 1              | 1       |
| 38        | 1     | 1             | 1            | 1      | 1        | 1       | 1       | 1                | 1           | 1       | 1       | 1                | 1       | 1        | 1       | 1           | 1        | 1      | 1              | 1       |
| 39        | 1     | 1             | 1            | 1      | 1        | 1       | 1       | 1                | 1           | 1       | 1       | 1                | 1       | 1        | 1       | 1           | 1        | 1      | 1              | 1       |
| 40        | 1     | 1             | 1            | 1      | 1        | 1       | 1       | 1                | 1           | 1       | 1       | 1                | 1       | 1        | 1       | 1           | 1        | 1      | 1              | 1       |
| 41        | 1     | 1             | 1            | 1      | 1        | 1       | 1       | 1                | 1           | 1       | 1       | 1                | 1       | 1        | 1       | 1           | 1        | 1      | 1              | 1       |
| 42        | 1     | 1             | 1            | 1      | 1        | 1       | 1       | 1                | 1           | 1       | 1       | 1                | 1       | 1        | 1       | 1           | 1        | 1      | 1              | 1       |
| 43        | 1     | 1             | 1            | 1      | 1        | 1       | 1       | 1                | 1           | 1       | 1       | 1                | 1       | 1        | 1       | 1           | 1        | 1      | 1              | 1       |
| 44        | 1     | 1             | 1            | 1      | 1        | 1       | 1       | 1                | 1           | 1       | 1       | 1                | 1       | 1        | 1       | 1           | 1        | 1      | 1              | 1       |
| 45        | 1     | 1             | 1            | 1      | 1        | 1       | 1       | 1                | 1           | 1       | 1       | 1                | 1       | 1        | 1       | 1           | 1        | 1      | 1              | 1       |
| 46        | 1     | 1             | 1            | 1      | 1        | 1       | 1       | 1                | 1           | 1       | 1       | 1                | 1       | 1        | 1       | 1           | 1        | 1      | 1              | 1       |
| 47        | 1     | 1             | 1            | 1      | 1        | 1       | 1       | 1                | 1           | 1       | 1       | 1                | 1       | 1        | 1       | 1           | 1        | 1      | 1              | 1       |
| 48        | 1     | 1             | 1            | 1      | 1        | 1       | 1       | 1                | 1           | 1       | 1       | 1                | 1       | 1        | 1       | 1           | 1        | 1      | 1              | 1       |
| 49        | 1     | 1             | 1            | 1      | 1        | 1       | 1       | 1                | 1           | 1       | 1       | 1                | 1       | 1        | 1       | 1           | 1        | 1      | 1              | 1       |
| 50        | 1     | 1             | 1            | 1      | 1        | 1       | 1       | 1                | 1           | 1       | 1       | 1                | 1       | 1        | 1       | 1           | 1        | 1      | 1              | 1       |
| freq      | 0.9   | 0.82          | 0.9          | 0.88   | 0.82     | 0.76    | 0.74    | 0.96             | 0.8         | 0.98    | 0.98    | 0.94             | 0.82    | 0.82     | 0.9     | 0.9         | 0.76     | 0.82   | 0.8            | 0.86    |
| mean.freq | 0.858 |               |              |        |          |         |         |                  |             |         |         |                  |         |          |         |             |          |        |                |         |

Supplementary Table 2 - Variants Detected in the SK-BR-3 Population Sample After Database Filtering

Table 2.1 - SNVs in Cancer Genes

| Single Nucleotide Variants |           |           |           |                                               |     |     |         |           |          |      |                   |              |        |            |            |
|----------------------------|-----------|-----------|-----------|-----------------------------------------------|-----|-----|---------|-----------|----------|------|-------------------|--------------|--------|------------|------------|
| chrom                      | start     | stop      | gene      | description                                   | REF | MUT | COSMIC  | CANCER    | Polyphen | SIFT | Type              | Genbank ID   | Exon   | Nucleotide | Amino Acid |
| chr1                       | 143642159 | 143642159 | PDE4DIP   | phosphodiesterase 4D interacting protein      | T   | G   | NA      | PDE4DIP   | 0.454381 | 0.53 | nonsynonymous SNV | NM_001002811 | exon1  | c.A907C    | p.L303L    |
| chr1                       | 155023172 | 155023172 | PRCC      | papillary renal cell carcinoma                | C   | G   | NA      | PRCC      | 0.707    | 0.06 | nonsynonymous SNV | NM_005973    | exon3  | c.C665G    | p.S222C    |
| chr2                       | 131405298 | 131405298 | ARHGEF4   | Rho guanine nucleotide exchange factor        | A   | G   | p.K100R | NA        | 0.015    | 0    | nonsynonymous SNV | NM_032995    | exon3  | c.A298G    | p.K100E    |
| chr2                       | 241726813 | 241726813 | PASK      | PAS domain containing serine/threonine k      | G   | A   | p.R224C | NA        | 0        | 0.01 | nonsynonymous SNV | NM_001252119 | exon5  | c.C670T    | p.R224C    |
| chr7                       | 13994257  | 13994257  | ETV1      | ets variant 1                                 | C   | A   | NA      | ETV1      | NA       | 0    | nonsynonymous SNV | NM_001163148 | exon4  | c.G112T    | p.D38Y     |
| chr8                       | 23068382  | 23068382  | TNFRSF10D | tumor necrosis factor receptor superfamily A  | G   | NA  | NA      | TNFRSF10D | 0.005    | 0.79 | nonsynonymous SNV | NM_003840    | exon2  | c.T206C    | p.V69A     |
| chr9                       | 121051197 | 121051197 | DBC1      | deleted in breast cancer 1                    | C   | T   | NA      | DBC1      | 0.039    | 0.76 | nonsynonymous SNV | NM_014618    | exon3  | c.G271A    | p.V91I     |
| chr11                      | 116595661 | 116595661 | PCSK7     | proprotein convertase subtilisin/kexin type C | G   | NA  | NA      | PCSK7     | 0.989    | 0.03 | nonsynonymous SNV | NM_004716    | exon10 | c.G1179C   | p.Q393H    |
| chr12                      | 55400380  | 55400380  | NACA      | nascent polypeptide associated                | C   | T   | NA      | NACA      | NA       | NA   | nonsynonymous SNV | NM_001113203 | exon3  | c.G1201A   | p.V401I    |
| chr15                      | 38244647  | 38244647  | BUB1B     | budding uninhibited by benzimidazoles         | C   | G   | NA      | BUB1B     | 0.831    | 0.05 | nonsynonymous SNV | NM_003467    | exon2  | c.C137G    | p.A46G     |
| chr16                      | 67413591  | 67413591  | CDH1      | ecadherin                                     | G   | A   | NA      | CDH1      | 0.093    | 0.58 | nonsynonymous SNV | NM_004360    | exon12 | c.G1898A   | p.G633E    |
| chr17                      | 56832330  | 56832330  | TBX2      | t-box2                                        | C   | T   | NA      | TBX2      | NA       | NA   | nonsynonymous SNV | NM_005994    | exon1  | c.C11T     | p.P4L      |
| chr17                      | 73006273  | 73006273  | SEPT9     | septin9                                       | G   | A   | NA      | 41161     | NA       | NA   | nonsynonymous SNV | NM_001113491 | exon12 | c.G1699A   | p.E567K    |
| chr22                      | 21986180  | 21986180  | BCR       | breakpoint cluster region                     | G   | C   | NA      | BCR       | 0.981    | 0.12 | nonsynonymous SNV | NM_021574    | exon20 | c.G3351C   | p.E1117D   |

Table 2.2 - Copy Number Aberrations in Cancer Genes

| COPY NUMBER CHANGES |             |             |       |                                           |     |     |        |        |          |      |               |              |            |          |
|---------------------|-------------|-------------|-------|-------------------------------------------|-----|-----|--------|--------|----------|------|---------------|--------------|------------|----------|
| chrom               | start       | stop        | gene  | description                               | REF | MUT | COSMIC | CANCER | Polyphen | SIFT | Type          | Genbank ID   | Exon       | CNV Size |
| chr7                | 113,553,429 | 128,201,868 | MET   | met proto-oncogene (hepatocyte growth f   | NA  | NA  | NA     | MET    | NA       | NA   | amplification | NM_001127500 | 14,648,439 |          |
| chr8                | 80,441,105  | 82,047,515  | TPD52 | tumor protein D52                         | NA  | NA  | NA     | TPD52  | NA       | NA   | amplification | NM_001025252 | 1,606,410  |          |
| chr8                | 127,944,325 | 129,238,921 | MYC   | v-myc myelocytomatosis viral oncogene h   | NA  | NA  | NA     | MYC    | NA       | NA   | amplification | NM_002467    | 1,294,596  |          |
| chr17               | 34,638,124  | 35,687,866  | ERBB2 | v-erb-b2 erythroblastic leukemia viral on | NA  | NA  | NA     | ERBB2  | NA       | NA   | amplification | NM_004448    | 1,049,742  |          |
| chr18               | 47,268,041  | 49,556,651  | DCC   | deleted in colorectal carcinoma           | NA  | NA  | NA     | DCC    | NA       | NA   | deletion      | NM_005215    | 2,288,610  |          |
| chr20               | 51,237,627  | 52,752,534  | BCAS1 | breast carcinoma amplified sequence 1     | NA  | NA  | NA     | BCAS1  | NA       | NA   | amplification | NM_003657    | 1,514,907  |          |

Table 2.3 - Structural Variations in Cancer Genes

| chromA | posA      | ori | chromB | posB      | ori | SV  | size | gene1    | locA   | gene2    | locB       |
|--------|-----------|-----|--------|-----------|-----|-----|------|----------|--------|----------|------------|
| chr3   | 59869602  | -   | chr4   | 11848375  | -   | CTX | na   | FHIT     | intron | BC042433 | intron     |
| chr1   | 168918112 | +   | chr5   | 115026581 | -   | CTX | na   | PRRX1    | intron | na       | intergenic |
| chr5   | 170412592 | -   | chr4   | 141158386 | +   | CTX | na   | RANBP17  | intron | MAML3    | intron     |
| chr7   | 81839816  | -   | chr10  | 72863536  | -   | CTX | na   | CACNA2D1 | intron | CDH23    | intron     |
| chr7   | 81839816  | -   | chr10  | 123218964 | -   | CTX | na   | CACNA2D1 | intron | na       | intergenic |
| chr1   | 6123615   | -   | chr12  | 7724218   | -   | CTX | na   | CHD5     | intron | na       | intergenic |
| chr14  | 68028531  | +   | chr15  | 45493129  | +   | CTX | na   | RAD51L1  | intron | SEMA6D   | intron     |
| chr17  | 56206424  | +   | chr1   | 107732321 | +   | CTX | na   | BCAS3    | intron | NTNG1    | intron     |
| chr11  | 84872659  | -   | chr17  | 30502226  | -   | CTX | na   | DLG2     | intron | UNC45B   | intron     |
| chr17  | 56234250  | +   | chr3   | 63679167  | -   | CTX | na   | BCAS3    | intron | na       | intergenic |
| chr17  | 35727911  | +   | chr8   | 79637981  | -   | CTX | na   | RARA     | intron | PKIA     | intron     |
| chr17  | 56642484  | -   | chr20  | 58278795  | -   | CTX | na   | BCAS3    | intron | AX747739 | intron     |
| chr9   | 96951143  | +   | chr11  | 92515396  | -   | CTX | na   | FANCC    | intron | na       | intergenic |
| chr3   | 25449788  | -   | chr3   | 25449791  | +   | ITX | na   | RARB     | intron | RARB     | intron     |
| chr3   | 79619024  | -   | chr3   | 79619042  | +   | ITX | na   | ROBO1    | intron | ROBO1    | intron     |
| chr3   | 189858605 | -   | chr3   | 189858642 | +   | ITX | na   | LPP      | intron | LAPP     | intron     |
| chr5   | 170759914 | -   | chr5   | 170759937 | +   | ITX | na   | NPM1     | intron | NPM1     | intron     |
| chr10  | 22066099  | -   | chr10  | 22066109  | +   | ITX | na   | MLLT10   | intron | MLLT10   | intron     |
| chr11  | 83193271  | -   | chr11  | 83193309  | +   | ITX | na   | DLG2     | intron | DLG2     | intron     |
| chr12  | 52655935  | -   | chr12  | 52655937  | +   | ITX | na   | HOXC11   | 3'UTR  | HOXC11   | 3'UTR      |
| chr14  | 80546962  | -   | chr14  | 104052296 | +   | ITX | na   | TSHR     | intron | na       | intergenic |
| chr17  | 38477065  | -   | chr17  | 38477068  | +   | ITX | na   | BRCA1    | intron | BRCA1    | intron     |
| chr17  | 57161153  | -   | chr17  | 57161170  | +   | ITX | na   | BRIP1    | intron | BRIP1    | intron     |
| chr19  | 59304916  | -   | chr19  | 59305075  | +   | ITX | na   | TFPT     | intron | TFPT     | 3'UTR      |
| chr20  | 9496835   | -   | chr20  | 33318447  | +   | ITX | na   | PAK7     | intron | MMP24    | exon       |
| chr21  | 35317063  | -   | chr21  | 35317089  | +   | ITX | na   | RUNX1    | intron | RUNX1    | intron     |
| chr21  | 41764584  | -   | chr21  | 41764587  | +   | ITX | na   | TMPPRS2  | intron | TMPPRS2  | intron     |
| chr9   | 97080898  | -   | chr9   | 97080901  | +   | ITX | na   | FANCC    | intron | FANCC    | intron     |
| chr7   | 55107279  | +   | chr7   | 55107306  | -   | DEL | 27   | EGFR     | intron | na       | na         |
| chr2   | 29852732  | +   | chr2   | 29852804  | -   | DEL | 72   | ALK      | intron | na       | na         |
| chr21  | 38785760  | +   | chr21  | 38785863  | -   | DEL | 103  | ERG      | intron | na       | na         |
| chr21  | 35217855  | +   | chr21  | 35218063  | -   | DEL | 208  | RUNX1    | intron | na       | na         |
| chr9   | 138547346 | +   | chr9   | 138547617 | -   | DEL | 271  | NOTCH1   | intron | na       | na         |
| chr7   | 81793863  | +   | chr7   | 81794142  | -   | DEL | 279  | CACNA2D1 | intron | na       | na         |
| chr1   | 114845055 | +   | chr1   | 114845352 | -   | DEL | 297  | TRIM33   | intron | na       | na         |
| chr14  | 80538881  | +   | chr14  | 80539181  | -   | DEL | 300  | TSHR     | intron | na       | na         |
| chr3   | 189787544 | +   | chr3   | 189787859 | -   | DEL | 315  | LPP      | intron | na       | na         |
| chr7   | 81566677  | +   | chr7   | 81567001  | -   | DEL | 324  | CACNA2D1 | intron | na       | na         |
| chr8   | 119049954 | +   | chr8   | 119050290 | -   | DEL | 336  | EXT1     | intron | na       | na         |
| chr8   | 31690798  | +   | chr8   | 31691137  | -   | DEL | 339  | NRG1     | intron | na       | na         |
| chr11  | 128187927 | +   | chr11  | 128188621 | -   | DEL | 694  | FLJ1     | intron | na       | na         |
| chr3   | 61102230  | +   | chr3   | 61103231  | -   | DEL | 1001 | FHIT     | intron | na       | na         |
| chr17  | 53042811  | +   | chr17  | 53044914  | -   | DEL | 2103 | MSI2     | intron | na       | na         |

**Supplementary Table 3 - Somatic Mutations Detected by Sequencing Populations of ER Tumor Cells**

**Nonsynonymous SNVs**

| chrom | position  | gene    | type              | region | REF | VAR | BCN | BCT | Exome | COSMIC   | CANCER  | TCGA | Polyphen | SIFT | GenBank      | nucleotide | Amino Acid |
|-------|-----------|---------|-------------------|--------|-----|-----|-----|-----|-------|----------|---------|------|----------|------|--------------|------------|------------|
| chr1  | 170277897 | DNM3    | nonsynonymous SNV | exon8  | A   | C   | A   | C   | C     | NA       | NA      | 1%   | NA       | 0.02 | NM_015569    | c.A1118C   | p.E373A    |
| chr1  | 246105875 | TRIM58  | nonsynonymous SNV | exon6  | G   | A   | G   | A   | A     | NA       | NA      | 0%   | 0        | 0.06 | NM_015431    | c.G922A    | p.A308T    |
| chr3  | 113672857 | BTLA    | nonsynonymous SNV | exon3  | C   | T   | C   | T   | T     | NA       | NA      | 0%   | 0.08     | 0.27 | NM_181780    | c.G439A    | p.E147K    |
| chr3  | 127173667 | ROPN1B  | nonsynonymous SNV | exon2  | G   | C   | G   | C   | C     | NA       | NA      | 0%   | 0.999    | 0.01 | NM_001012337 | c.G80C     | p.R27P     |
| chr3  | 180434779 | PIK3CA  | nonsynonymous SNV | exon21 | A   | G   | A   | G   | G     | p.H1047Q | PIK3CA  | 34%  | 0.995    | 1    | NM_006218    | c.A3140G   | p.H1047R   |
| chr3  | 195874086 | LSG1    | nonsynonymous SNV | exon1  | G   | A   | G   | A   | A     | NA       | NA      | 0%   | 0.063    | 0    | NM_018385    | c.C95T     | p.S32F     |
| chr4  | 185790457 | CASP3   | nonsynonymous SNV | exon4  | T   | C   | T   | C   | C     | NA       | CASP3   | 1%   | 0.99     | 0    | NM_032991    | c.A266G    | p.N89S     |
| chr5  | 127708012 | FBN2    | nonsynonymous SNV | exon25 | C   | T   | C   | T   | T     | NA       | FBN2    | 1%   | 0.998    | 0.03 | NM_001999    | c.G3307A   | p.G1103S   |
| chr10 | 3204939   | PITRM1  | nonsynonymous SNV | exon1  | C   | T   | C   | T   | T     | NA       | NA      | 1%   | NA       | 0    | NM_001242307 | c.G26A     | p.G9D      |
| chr11 | 72377664  | FCHSD2  | nonsynonymous SNV | exon6  | C   | T   | C   | T   | T     | NA       | NA      | 0%   | 0.252    | 0.01 | NM_014824    | c.G514A    | p.E172K    |
| chr14 | 62958514  | PPP2R5E | nonsynonymous SNV | exon4  | C   | G   | C   | G   | G     | NA       | PPP2R5E | 1%   | 0.998    | 0    | NM_006246    | c.G406C    | p.D136H    |
| chrX  | 27908828  | DCAF8L1 | nonsynonymous SNV | exon1  | A   | G   | A   | A   | G     | NA       | NA      | 1%   | 0.243    | 0.02 | NM_001017930 | c.T545C    | p.F182S    |

## Supplementary Table 4

ER Subclonal Mutations Detected by Whole Genome Single-Cell Sequencing

| chrom   | position  | cells | REF | VAR | location   | gene     |
|---------|-----------|-------|-----|-----|------------|----------|
| 4 cells |           |       |     |     |            |          |
| chr3    | 117559827 | 4     | C   | T   | intron     | LSAMP    |
| chr10   | 60254617  | 4     | G   | A   | intergenic | BICC1    |
| chr15   | 19306543  | 4     | G   | A   | intron     | POTEB    |
| chr20   | 5961340   | 4     | C   | T   | intron     | CRLS1    |
| chr11   | 315910    | 4     | G   | A   | intergenic | na       |
| 3 cells |           |       |     |     |            |          |
| chr8    | 37251228  | 3     | C   | T   | intergenic |          |
| chr14   | 87750052  | 3     | T   | C   | intron     | KCNK10   |
| chr21   | 29751265  | 3     | G   | A   | intergenic | na       |
| chr19   | 10056229  | 3     | A   | T   | intergenic | na       |
| chr1    | 246588486 | 3     | G   | A   | intergenic | na       |
| chr5    | 90529295  | 3     | T   | G   | intergenic | na       |
| chr1    | 195812959 | 3     | G   | C   | intron     | C1orf218 |
| chr21   | 45206308  | 3     | A   | G   | intron     | C21orf70 |
| chr5    | 16144080  | 3     | G   | A   | exonic     | MARCH11  |
| 2 cells |           |       |     |     |            |          |
| chr4    | 190862494 | 2     | G   | A   | intergenic | na       |
| chr8    | 96280719  | 2     | C   | A   | intergenic | na       |
| chr2    | 1948165   | 2     | C   | T   | intron     | MYT1L    |
| chr5    | 24884256  | 2     | G   | C   | intergenic | na       |
| chrX    | 49747437  | 2     | A   | G   | 3_UTR      | CLCN5    |
| chrX    | 149390723 | 2     | C   | T   | intron     | MAMLD1   |
| chr7    | 131332648 | 2     | T   | C   | intergenic | na       |
| chr5    | 73784959  | 2     | A   | T   | intergenic | na       |
| chr20   | 21832958  | 2     | T   | C   | intergenic | na       |
| chr20   | 21812989  | 2     | G   | A   | intergenic | na       |
| chr19   | 13167561  | 2     | C   | G   | intergenic | na       |
| chr15   | 73101337  | 2     | G   | A   | intergenic | na       |
| chr14   | 41732753  | 2     | G   | T   | intergenic | na       |
| chr11   | 67043877  | 2     | G   | A   | exonic     | CABP2    |
| chr11   | 50390924  | 2     | G   | T   | intergenic | na       |
| chr10   | 13911703  | 2     | G   | A   | intron     | FRMD4A   |
| chr8    | 52223003  | 2     | C   | T   | intergenic | na       |
| chrX    | 30425887  | 2     | C   | T   | intergenic | na       |

**Supplementary Table 5.1 - ER Single Nuclei Sequencing Coverage Metrics**

| Sample Origin | Sample ID | Type        | capture      | cov_depth | cov_breadth |
|---------------|-----------|-------------|--------------|-----------|-------------|
| tumor         | cell1     | single cell | whole-genome | 43        | 73.37%      |
| tumor         | cell2     | single cell | whole-genome | 35        | 78.31%      |
| tumor         | cell3     | single cell | whole-genome | 49        | 88.98%      |
| tumor         | cell4     | single cell | whole-genome | 60        | 82.48%      |
|               |           |             | mean         | 46.75     | 80.79%      |
| tumor         | c1        | single cell | exome        | 49        | 96.68%      |
| tumor         | c2        | single cell | exome        | 56        | 96.82%      |
| tumor         | c3        | single cell | exome        | 59        | 96.40%      |
| tumor         | c4        | single cell | exome        | 46        | 96.41%      |
| tumor         | c5        | single cell | exome        | 41        | 96.04%      |
| tumor         | c6        | single cell | exome        | 39        | 96.23%      |
| tumor         | c7        | single cell | exome        | 53        | 96.84%      |
| tumor         | c8        | single cell | exome        | 86        | 97.76%      |
| tumor         | c9        | single cell | exome        | 63        | 97.24%      |
| tumor         | c10       | single cell | exome        | 57        | 97.07%      |
| tumor         | c11       | single cell | exome        | 42        | 96.32%      |
| tumor         | c12       | single cell | exome        | 110       | 96.26%      |
| tumor         | c13       | single cell | exome        | 82        | 95.25%      |
| tumor         | c14       | single cell | exome        | 92        | 93.76%      |
| tumor         | c15       | single cell | exome        | 162       | 96.42%      |
| tumor         | c16       | single cell | exome        | 50        | 92.35%      |
| tumor         | c17       | single cell | exome        | 80        | 92.29%      |
| tumor         | c18       | single cell | exome        | 31        | 88.17%      |
| tumor         | c19       | single cell | exome        | 28        | 88.04%      |
| tumor         | c20       | single cell | exome        | 24        | 86.62%      |
| tumor         | c21       | single cell | exome        | 25        | 85.88%      |
| tumor         | c22       | single cell | exome        | 44        | 94.95%      |
| tumor         | c23       | single cell | exome        | 46        | 92.91%      |
| tumor         | c24       | single cell | exome        | 53        | 96.68%      |
| tumor         | c25       | single cell | exome        | 47        | 92.73%      |
| tumor         | c26       | single cell | exome        | 34        | 94.04%      |
| tumor         | c27       | single cell | exome        | 35        | 94.19%      |
| tumor         | c28       | single cell | exome        | 36        | 93.76%      |
| tumor         | c29       | single cell | exome        | 39        | 94.84%      |
| tumor         | c30       | single cell | exome        | 38        | 94.36%      |
| tumor         | c31       | single cell | exome        | 36        | 93.77%      |
| tumor         | c32       | single cell | exome        | 44        | 94.69%      |
| tumor         | c33       | single cell | exome        | 42        | 94.19%      |
| tumor         | c34       | single cell | exome        | 38        | 94.03%      |
| tumor         | c35       | single cell | exome        | 46        | 94.08%      |
| tumor         | c36       | single cell | exome        | 33        | 90.96%      |
| tumor         | c37       | single cell | exome        | 39        | 95.75%      |
| tumor         | c38       | single cell | exome        | 43        | 96.08%      |
| tumor         | c39       | single cell | exome        | 33        | 91.78%      |
| tumor         | c40       | single cell | exome        | 40        | 95.63%      |
| tumor         | c41       | single cell | exome        | 30        | 94.19%      |
| tumor         | c42       | single cell | exome        | 32        | 95.13%      |
| tumor         | c43       | single cell | exome        | 32        | 95.06%      |
| tumor         | c44       | single cell | exome        | 46        | 93.78%      |
| tumor         | c45       | single cell | exome        | 30        | 91.79%      |
| tumor         | c46       | single cell | exome        | 35        | 89.05%      |
| tumor         | c47       | single cell | exome        | 27        | 90.45%      |
| normal        | n1        | single cell | exome        | 50        | 86.53%      |
| normal        | n2        | single cell | exome        | 46        | 85.84%      |
| normal        | n3        | single cell | exome        | 51        | 88.74%      |
| normal        | n4        | single cell | exome        | 48        | 81.95%      |
| normal        | n5        | single cell | exome        | 55        | 78.92%      |
| normal        | n6        | single cell | exome        | 26        | 85.31%      |
| normal        | n7        | single cell | exome        | 30        | 89.05%      |
| normal        | n8        | single cell | exome        | 22        | 83.51%      |
| normal        | n9        | single cell | exome        | 46        | 94.42%      |
| normal        | n10       | single cell | exome        | 34        | 93.75%      |
| normal        | n11       | single cell | exome        | 40        | 93.32%      |
| normal        | n12       | single cell | exome        | 39        | 94.65%      |
|               |           |             | mean         | 46.78     | 93%         |

**Supplementary Table 5.2 - TNBC Single Cell Sequencing Coverage Metrics**

| Sample Origin | Identifier | Sample      | Capture | cov_depth | cov_breadth |
|---------------|------------|-------------|---------|-----------|-------------|
| tumor         | a1         | single cell | exome   | 56        | 92.7%       |
| tumor         | a2         | single cell | exome   | 61        | 93.8%       |
| tumor         | a3         | single cell | exome   | 56        | 93.0%       |
| tumor         | a4         | single cell | exome   | 52        | 92.2%       |
| tumor         | a5         | single cell | exome   | 42        | 91.4%       |
| tumor         | a6         | single cell | exome   | 50        | 91.8%       |
| tumor         | a7         | single cell | exome   | 48        | 92.2%       |
| tumor         | a8         | single cell | exome   | 46        | 91.6%       |
| tumor         | h1         | single cell | exome   | 43        | 78.8%       |
| tumor         | h2         | single cell | exome   | 55        | 90.3%       |
| tumor         | h3         | single cell | exome   | 58        | 90.3%       |
| tumor         | h4         | single cell | exome   | 47        | 84.8%       |
| tumor         | h5         | single cell | exome   | 50        | 87.1%       |
| tumor         | h6         | single cell | exome   | 47        | 86.8%       |
| tumor         | h7         | single cell | exome   | 41        | 84.7%       |
| tumor         | h8         | single cell | exome   | 57        | 89.7%       |
| normal        | n1         | single cell | exome   | 49        | 92.4%       |
| normal        | n2         | single cell | exome   | 33        | 88.0%       |
| normal        | n3         | single cell | exome   | 52        | 91.9%       |
| normal        | n4         | single cell | exome   | 97        | 93.5%       |
| normal        | n5         | single cell | exome   | 53        | 91.7%       |
| normal        | n6         | single cell | exome   | 56        | 90.6%       |
| normal        | n7         | single cell | exome   | 52        | 92.3%       |
| normal        | n8         | single cell | exome   | 47        | 91.4%       |
| normal        | n9         | single cell | exome   | 52        | 90.7%       |
| normal        | n10        | single cell | exome   | 61        | 89.2%       |
| normal        | n11        | single cell | exome   | 63        | 87.5%       |
| normal        | n12        | single cell | exome   | 43        | 94.0%       |
| normal        | n13        | single cell | exome   | 58        | 90.7%       |
| normal        | n14        | single cell | exome   | 20        | 89.5%       |
| normal        | n15        | single cell | exome   | 55        | 94.5%       |
| normal        | n16        | single cell | exome   | 31        | 92.8%       |
| mean          |            |             |         | 50.97     | 90.4%       |













|   |           |       |           |          |                   |   |   |     |         |       |          |      |              |        |          |          |          |             |
|---|-----------|-------|-----------|----------|-------------------|---|---|-----|---------|-------|----------|------|--------------|--------|----------|----------|----------|-------------|
| 2 | subclonal | chr17 | 65640950  | KCNJ16   | nonsynonymous SNV | C | T | het | NA      | NA    | 0.303    | 0.21 | NM_001270422 | exon6  | c.C1127T | p.A376V  | 0.000000 | NA          |
| 2 | subclonal | chr6  | 42820873  | TBCC     | nonsynonymous SNV | G | A | het | NA      | NA    | 1        | 0.01 | NM_003192    | exon1  | c.C917T  | p.S306F  | 0.000243 | NA          |
| 2 | subclonal | chr15 | 88411840  | ZNF710   | nonsynonymous SNV | T | C | het | NA      | NA    | 0.004    | 0    | NM_198526    | exon2  | c.T467C  | p.V156A  | 0.000000 | NA          |
| 2 | subclonal | chr8  | 70748004  | SLCOSA1  | nonsynonymous SNV | A | G | het | NA      | NA    | 0.999    | 0.16 | NM_030958    | exon10 | c.T2201C | p.F734S  | 0.000000 | NA          |
| 2 | subclonal | chr7  | 27823155  | TAX1BP1  | nonsynonymous SNV | T | A | het | NA      | NA    | 0.99     | NA   | NM_006024    | exon15 | c.T2058A | p.D686E  | 0.000000 | NA          |
| 2 | subclonal | chr6  | 31887710  | HSPAL1   | nonsynonymous SNV | T | C | het | NA      | NA    | 0        | 0    | NM_005527    | exon2  | c.A196G  | p.I7V    | 0.000000 | NA          |
| 2 | subclonal | chr18 | 6938500   | LAMA1    | nonsynonymous SNV | A | G | het | NA      | NA    | 0.974    | 0.16 | NM_005559    | exon60 | c.T8612C | p.L2871P | 0.000000 | NA          |
| 2 | subclonal | chr6  | 28466767  | ZSCAN12  | nonsynonymous SNV | A | G | het | NA      | NA    | NA       | 0.01 | NM_001163391 | exon4  | c.T1279C | p.S427P  | 0.000000 | NA          |
| 2 | subclonal | chr17 | 32586770  | ACACA    | nonsynonymous SNV | T | C | het | NA      | NA    | 0.838    | 0.33 | NM_198834    | exon43 | c.A5395G | p.S1799G | 0.000220 | 0.043662191 |
| 2 | subclonal | chr6  | 99390705  | POU3F2   | nonsynonymous SNV | T | C | het | NA      | NA    | 0.996    | 0    | NM_005604    | exon1  | c.T1235C | p.M412T  | 0.000000 | NA          |
| 2 | subclonal | chr5  | 145611530 | RBM27    | nonsynonymous SNV | C | T | het | NA      | NA    | 0.793    | 0    | NM_018989    | exon9  | c.C1343T | p.P448L  | 0.000000 | NA          |
| 2 | subclonal | chr14 | 92755443  | UBR7     | nonsynonymous SNV | A | G | het | NA      | NA    | 0.73     | 0.06 | NM_175748    | exon8  | c.A943G  | p.T315A  | 0.000123 | 0.069184657 |
| 2 | subclonal | chr3  | 58495200  | ACOX2    | nonsynonymous SNV | C | T | het | NA      | NA    | 0        | 0.33 | NM_003500    | exon3  | c.G250A  | p.A84T   | 0.000190 | 0.049284686 |
| 2 | subclonal | chr11 | 85123211  | SYTL2    | nonsynonymous SNV | G | A | het | NA      | NA    | 0.535681 | 0    | NM_032943    | exon7  | c.C806T  | p.P269L  | 0.000271 | 0.002702989 |
| 2 | subclonal | chr9  | 79236100  | GNA14    | nonsynonymous SNV | C | T | het | NA      | GNA14 | 0.998    | 0    | NM_004297    | exon4  | c.G550A  | p.G184S  | 0.000269 | 0.002700196 |
| 2 | subclonal | chr6  | 43720925  | RSPH9    | nonsynonymous SNV | G | A | het | NA      | NA    | 0.009    | 0.24 | NM_001193341 | exon1  | c.G112A  | p.D38N   | 0.000000 | NA          |
| 2 | subclonal | chr2  | 134915832 | MGAT5    | nonsynonymous SNV | C | A | het | NA      | NA    | 0.813    | 0.29 | NM_002410    | exon15 | c.C1903A | p.L635I  | 0.000460 | 2.63E-43    |
| 2 | subclonal | chr15 | 32142634  | CHRM5    | nonsynonymous SNV | C | T | het | p.R142C | CHRM5 | 1        | 0    | NM_012125    | exon3  | c.C424T  | p.R142C  | 0.010630 | 1.63E-167   |
| 2 | subclonal | chr14 | 23678497  | EMC9     | nonsynonymous SNV | T | C | het | NA      | NA    | 0.989    | 0.25 | NM_016049    | exon5  | c.A352G  | p.N118D  | 0.005144 | 3.13E-120   |
| 2 | subclonal | chr5  | 39170767  | FYB      | nonsynonymous SNV | C | T | het | NA      | NA    | NA       | NA   | NM_199335    | exon8  | c.G1622A | p.R541H  | 0.004064 | 3.79E-72    |
| 2 | subclonal | chr11 | 129245178 | NFRKB    | nonsynonymous SNV | C | A | het | NA      | NA    | 0.991    | 0.11 | NM_001143835 | exon24 | c.G2952T | p.Q984H  | 0.003068 | 4.48E-58    |
| 2 | subclonal | chr15 | 43036445  | C15orf43 | nonsynonymous SNV | G | A | het | NA      | NA    | 0.812    | 0    | NM_152448    | exon2  | c.G124A  | p.A42T   | 0.000164 | 0.05563136  |
| 2 | subclonal | chr3  | 31596325  | ST3B     | nonsynonymous SNV | A | G | het | NA      | NA    | 0.009    | 0.07 | NM_178862    | exon3  | c.A444G  | p.I148M  | 0.000000 | NA          |
| 2 | subclonal | chr3  | 158245950 | LEKR1    | nonsynonymous SNV | C | T | het | NA      | NA    | 0.63     | 0.21 | NM_001004316 | exon13 | c.C1796T | p.P599L  | 0.003457 | 7.28E-62    |
| 2 | subclonal | chr19 | 7598245   | XAB2     | nonsynonymous SNV | C | T | het | NA      | NA    | 0.742    | 0    | NM_020196    | exon4  | c.G406A  | p.A136T  | 0.002758 | 2.46E-86    |
| 2 | subclonal | chr11 | 44245705  | ALX4     | nonsynonymous SNV | C | T | het | NA      | NA    | 0.999    | 0    | NM_021926    | exon3  | c.G821A  | p.R274H  | 0.000252 | 0.003016664 |
| 2 | subclonal | chr11 | 7937993   | NLRP10   | nonsynonymous SNV | A | G | het | NA      | NA    | 0.662    | 0.03 | NM_176821    | exon2  | c.T1742C | p.M581T  | 0.000000 | NA          |
| 2 | subclonal | chr11 | 93446151  | HEPH1    | nonsynonymous SNV | A | G | het | NA      | NA    | NA       | NA   | NM_001098672 | exon8  | c.A1402G | p.T468A  | 0.000000 | NA          |
| 2 | subclonal | chr1  | 168381957 | METTL11B | nonsynonymous SNV | A | G | het | NA      | NA    | NA       | 0.56 | NM_001136107 | exon1  | c.A85G   | p.I29V   | 0.000000 | NA          |
| 2 | subclonal | chr19 | 48914954  | IRGC     | nonsynonymous SNV | A | G | het | NA      | NA    | 0.999    | 0    | NM_019612    | exon2  | c.A404G  | p.D135G  | 0.000000 | NA          |
| 2 | subclonal | chrX  | 67854334  | STARDB8  | nonsynonymous SNV | T | C | het | NA      | NA    | 0        | 0.12 | NM_014725    | exon5  | c.T613C  | p.S205P  | 0.000000 | NA          |
| 2 | subclonal | chr12 | 112182630 | TPCN1    | nonsynonymous SNV | C | A | het | NA      | NA    | 0.067    | NA   | NM_017901    | exon3  | c.C187A  | p.P63T   | 0.000000 | NA          |
| 2 | subclonal | chr16 | 31342719  | ITGAD    | nonsynonymous SNV | G | A | het | NA      | NA    | 0        | 1    | NM_005353    | exon27 | c.G3098A | p.S1033N | 0.000609 | 9.80E-07    |
| 2 | subclonal | chr1  | 152017273 | SLC27A3  | nonsynonymous SNV | C | T | het | NA      | NA    | 0.057    | 0.17 | NM_024330    | exon5  | c.C1315T | p.R439C  | 0.000295 | 0.002292157 |
| 2 | subclonal | chr22 | 43974435  | KIAA0930 | nonsynonymous SNV | C | T | het | NA      | NA    | 0.87     | 0.36 | NM_015264    | exon8  | c.G1013A | p.R338Q  | 0.000000 | NA          |
| 2 | subclonal | chr3  | 187782498 | DNAJB11  | nonsynonymous SNV | C | T | het | NA      | NA    | 0.005    | 0.16 | NM_016306    | exon6  | c.C620T  | p.T207M  | 0.000093 | 0.083784775 |
| 2 | subclonal | chr6  | 30655688  | ABCF1    | nonsynonymous SNV | C | T | het | NA      | NA    | 0.471    | 0.06 | NM_001025091 | exon7  | c.C491T  | p.A164V  | 0.000000 | NA          |
| 2 | subclonal | chr11 | 6607914   | DCHS1    | nonsynonymous SNV | C | T | het | NA      | NA    | 0        | 0.42 | NM_003737    | exon10 | c.G4687A | p.A1563T | 0.000000 | NA          |
| 2 | subclonal | chr3  | 185573071 | THPO     | nonsynonymous SNV | G | A | het | NA      | NA    | 0.036    | 0.26 | NM_001177597 | exon6  | c.C974T  | p.A325V  | 0.000000 | NA          |
| 2 | subclonal | chr21 | 15261541  | NRIP1    | nonsynonymous SNV | C | T | het | NA      | NA    | 0.98     | 0.08 | NM_003489    | exon4  | c.G844A  | p.E282K  | 0.000132 | 0.065547296 |
| 2 | subclonal | chr5  | 71792719  | ZNF366   | nonsynonymous SNV | G | A | het | NA      | NA    | 0.97     | 0    | NM_152625    | exon2  | c.C361T  | p.R121C  | 0.000373 | 0.000150196 |
| 2 | subclonal | chrX  | 53449158  | SMC1A    | nonsynonymous SNV | G | A | het | NA      | NA    | 1        | 0    | NM_006306    | exon11 | c.C1903T | p.R635C  | 0.000000 | NA          |
| 2 | subclonal | chr19 | 56274650  | KLK14    | nonsynonymous SNV | G | A | het | NA      | NA    | 0.197    | NA   | NM_022046    | exon5  | c.C382T  | p.L128F  | 0.000000 | NA          |
| 2 | subclonal | chr1  | 195364270 | ASPM     | nonsynonymous SNV | A | G | het | NA      | NA    | 0.242    | 0.01 | NM_001206846 | exon10 | c.T2909C | p.V970A  | 0.000000 | NA          |
| 2 | subclonal | chr17 | 36760244  | KRT33A   | nonsynonymous SNV | G | A | het | NA      | NA    | 0        | 0.16 | NM_004138    | exon1  | c.C302T  | p.A101V  | 0.000000 | NA          |
| 2 | subclonal | chrX  | 48724750  | GRIPAP1  | nonsynonymous SNV | G | A | het | NA      | NA    | 0.017    | 0.23 | NM_020137    | exon16 | c.C1319T | p.T440M  | 0.000000 | NA          |
| 2 | subclonal | chr1  | 247109204 | ZNF672   | nonsynonymous SNV | C | T | het | NA      | NA    | 0.289    | 0.89 | NM_024836    | exon4  | c.C1108T | p.P370S  | 0.000000 | NA          |

**Supplemental Table 8 - Mathematical Modeling of Mutation Rates**

**Table 8.1 - ER Whole Genome Single-Cell Modeling**

| Cells | Observed | MR:0.6 | MR:0.7 | MR:0.8 | MR:0.9 | MR:1.0 | MR:1.1 | MR:1.2 | MR:1.3 | MR:1.4 | MR:1.5 | MR:1.6 | MR:1.7 | MR:1.8 | MR:1.9 | MR:2.0 |
|-------|----------|--------|--------|--------|--------|--------|--------|--------|--------|--------|--------|--------|--------|--------|--------|--------|
| 2     | 18       | 6      | 8      | 8      | 16     | 10     | 14     | 16     | 12     | 13     | 15     | 20     | 23     | 26     | 30     | 26     |
| 3     | 9        | 1      | 1      | 1      | 4      | 1      | 2      | 3      | 1      | 1      | 1      | 2      | 3      | 4      | 10     | 4      |
| 4     | 5        | 0      | 0      | 0      | 1      | 0      | 0      | 0      | 0      | 0      | 0      | 0      | 0      | 0      | 1      | 0      |
| 5     | 0        | 0      | 0      | 0      | 0      | 0      | 0      | 0      | 0      | 0      | 0      | 0      | 0      | 0      | 0      | 0      |
| 6     | 0        | 0      | 0      | 0      | 0      | 0      | 0      | 0      | 0      | 0      | 0      | 0      | 0      | 0      | 0      | 0      |
| SSD   |          | 233    | 189    | 189    | 45     | 153    | 90     | 65     | 125    | 114    | 98     | 78     | 86     | 114    | 161    | 114    |

**Table 8.2 - ER Single Cell Exome Modeling**

| Cells | Observed | MR=0.1 | MR=0.2 | MR=0.3 | MR:0.4 | MR:0.5 | MR:0.6 | MR:0.7 | MR:0.8 | MR:0.9 | MR:1.0 | MR:1.1 | MR:1.2 | MR:1.3 | MR:1.4 |
|-------|----------|--------|--------|--------|--------|--------|--------|--------|--------|--------|--------|--------|--------|--------|--------|
| 2     | 16       | 4      | 8      | 7      | 9      | 13     | 14     | 20     | 20     | 19     | 25     | 28     | 28     | 29     | 36     |
| 3     | 2        | 2      | 3      | 3      | 3      | 4      | 4      | 6      | 6      | 6      | 8      | 9      | 9      | 10     | 11     |
| 4     | 2        | 1      | 2      | 1      | 1      | 2      | 2      | 4      | 2      | 3      | 3      | 5      | 5      | 4      | 4      |
| 5     | 1        | 0      | 1      | 0      | 1      | 1      | 1      | 2      | 1      | 2      | 2      | 3      | 3      | 3      | 3      |
| 6     | 0        | 0      | 1      | 0      | 1      | 1      | 1      | 2      | 1      | 1      | 1      | 2      | 2      | 2      | 1      |
| SSD   |          | 123    | 51     | 67     | 40     | 9      | 7      | 51     | 43     | 36     | 140    | 236    | 236    | 273    | 532    |

**Table 8.3 - TNBC Single Cell Exome Modeling**

| Cells | Observed | MR:4 | MR:5 | MR:6 | MR:7 | MR:8 | MR:9 | MR:10 | MR:11 | MR:12 | MR:13 | MR:14 | MR:15 |
|-------|----------|------|------|------|------|------|------|-------|-------|-------|-------|-------|-------|
| 2     | 64       | 36   | 43   | 63   | 63   | 72   | 75   | 100   | 107   | 135   | 116   | 140   | 138   |
| 3     | 57       | 9    | 11   | 17   | 16   | 23   | 18   | 25    | 34    | 43    | 25    | 50    | 50    |
| 4     | 16       | 4    | 6    | 10   | 5    | 9    | 12   | 13    | 16    | 20    | 7     | 19    | 21    |
| 5     | 4        | 3    | 3    | 6    | 3    | 7    | 9    | 6     | 8     | 7     | 4     | 6     | 8     |
| 6     | 4        | 1    | 2    | 6    | 3    | 4    | 6    | 4     | 3     | 5     | 2     | 4     | 3     |
| SSD   |          | 3124 | 2672 | 2000 | 2182 | 1781 | 2266 | 3378  | 3521  | 6897  | 5195  | 7514  | 7207  |
